# Supplementary material for: Deep learning identifies partially overlapping subnetworks in the human social brain
Source: PubMed Central journal article supplement (PMC7809473; doi:10.1038/s42003-020-01559-z), 2021-01-14
Supplement: 42003_2020_1559_MOESM1_ESM.pdf [file 42003_2020_1559_MOESM1_ESM.pdf]

## Supplementary Online Material

### Deep learning identifies partially overlapping subnetworks in the human social brain

Hannah Kiesow, R. Nathan Spreng, Avram J. Holmes, M. Mallar Chakravarty  
Andre F. Marquand, B.T. Thomas Yeo, Danilo Bzdok

|                                   | <b>Percent</b> | <b>Mean</b> | <b>SD</b> | <b>Range</b> |
|-----------------------------------|----------------|-------------|-----------|--------------|
| Age                               |                | 55          | 7.5       | 40-70        |
| Sex                               |                |             |           |              |
| Female                            | 52.4           |             |           |              |
| Male                              | 47.6           |             |           |              |
| Ethnic background                 |                |             |           |              |
| British                           | 91.7           |             |           |              |
| Irish                             | 2.7            |             |           |              |
| Other white                       | 2.3            |             |           |              |
| background                        | 3.3            |             |           |              |
| Other                             |                |             |           |              |
| Age completed full time education |                | 17          | 2.3       | 5-35         |
| Body mass index (BMI)             |                | 26.7        | 4.3       | 16.1-63.6    |

**Supplementary Table 1.** Demographic information of the UK Biobank participants.

| <b>Social brain region</b>    | <b>Abbreviation</b> | <b>MNI coordinates</b> | <b>Cluster</b>     |
|-------------------------------|---------------------|------------------------|--------------------|
| left anterior insula          | AI_L                | -34 19 0               | intermediate       |
| right anterior insula         | AI_R                | 38 18 -3               | intermediate       |
| left amygdala                 | AM_L                | -21 -4 -18             | limbic             |
| right amygdala                | AM_R                | 23 -3 -18              | limbic             |
| anterior mid-cingulate cortex | aMCC                | 1 25 30                | intermediate       |
| left cerebellum               | Cereb_L             | -21 -66 -35            | intermediate       |
| right cerebellum              | Cereb_R             | 28 -70 -30             | intermediate       |
| dorsomedial prefrontal cortex | dmPFC               | -4 53 31               | higher associative |
| left fusiform gyrus           | FG_L                | -42 -62 -16            | visual sensory     |
| right fusiform gyrus          | FG_R                | 43 -57 -19             | visual sensory     |
| medial frontal pole           | FP                  | 1 58 10                | higher associative |
| left hippocampus              | HC_L                | -24 -18 -17            | limbic             |
| right hippocampus             | HC_R                | 25 -19 -15             | limbic             |
| left inferior frontal gyrus   | IFG_L               | -45 27 -3              | intermediate       |
| right inferior frontal gyrus  | IFG_R               | 48 24 2                | intermediate       |
| left middle temporal gyrus    | MTG_L               | -56 -14 -13            | higher associative |
| right middle temporal gyrus   | MTG_R               | 56 -10 -17             | higher associative |
| left middle temporal V5 area  | MT/V5_L             | -50 -66 5              | visual sensory     |
| right middle temporal V5 area | MT/V5_R             | 50 -66 6               | visual sensory     |
| left nucleus accumbens        | NAC_L               | -13 11 -8              | limbic             |

**Supplementary Table 2a. Social brain regions and their MNI coordinates.** Social brain regions and their respective functional network as depicted in<sup>1</sup>.

|                                          |        |            |                    |
|------------------------------------------|--------|------------|--------------------|
| right nucleus accumbens                  | NAC_R  | 11 10 -7   | limbic             |
| posterior cingulate cortex               | PCC    | -1 -54 23  | higher associative |
| posterior mid-cingulate cortex           | pMCC   | -3 -29 32  | higher associative |
| precuneus                                | Prec   | -1 -59 41  | higher associative |
| left posterior superior temporal sulcus  | pSTS_L | -56 -39 2  | visual sensory     |
| right posterior superior temporal sulcus | pSTS_R | 54 -39 0   | visual sensory     |
| rostral anterior cingulate cortex        | rACC   | -3 41 4    | limbic             |
| left supplementary motor area            | SMA_L  | -41 6 45   | intermediate       |
| right supplementary motor area           | SMA_R  | 48 6 35    | intermediate       |
| left supramarginal gyrus                 | SMG_L  | -41 -41 42 | intermediate       |
| right supramarginal gyrus                | SMG_R  | 54 -30 38  | intermediate       |
| left temporal pole                       | TP_L   | -48 8 -36  | higher associative |
| right temporal pole                      | TP_R   | 53 7 -26   | higher associative |
| left temporo-parietal junction           | TPJ_L  | -49 -61 27 | higher associative |
| right temporo-parietal junction          | TPJ_R  | 54 -55 20  | higher associative |
| ventromedial prefrontal cortex           | vmPFC  | 2 45 -15   | limbic             |

**Supplementary Table 2b. Social brain regions and their MNI coordinates.** Social brain regions and their respective functional network as depicted in<sup>1</sup>.

| <b>Hyperparameter</b> | <b>Possible values</b>      |
|-----------------------|-----------------------------|
| Bias                  | Yes, No                     |
| Epochs                | 15, 30                      |
| Learning rate         | 0.1, 0.01, 0.001, 0.0001    |
| Optimizer             | RMSprop, SGD, Adam, Adagrad |

**Supplementary Table 3. Considered hyperparameters before model training.** A grid search of these hyperparameter values were considered for training the autoencoder architectures.

| <b>Hidden Subnetwork</b> | <b>Data split 1</b> | <b>Data split 2</b> | <b>Data split 3</b> | <b>Data split 4</b> |
|--------------------------|---------------------|---------------------|---------------------|---------------------|
| 1                        | 0.892               | 0.878               | 0.872               | 0.873               |
| 2                        | 0.794               | 0.782               | 0.805               | 0.898               |
| 3                        | 0.805               | 0.810               | 0.802               | 0.745               |
| 4                        | 0.845               | 0.872               | 0.886               | 0.830               |
| 5                        | 0.824               | 0.816               | 0.790               | 0.759               |
| 6                        | 0.865               | 0.843               | 0.868               | 0.859               |
| 7                        | 0.913               | 0.922               | 0.897               | 0.860               |
| 8                        | 0.646               | 0.729               | 0.692               | 0.773               |
| 9                        | 0.885               | 0.885               | 0.839               | 0.812               |
| 10                       | 0.810               | 0.780               | 0.779               | 0.778               |
| 11                       | 0.816               | 0.825               | 0.840               | 0.825               |
| 12                       | 0.826               | 0.797               | 0.755               | 0.709               |
| 13                       | 0.643               | 0.653               | 0.632               | 0.745               |
| 14                       | 0.695               | 0.701               | 0.672               | 0.698               |
| 15                       | 0.821               | 0.846               | 0.846               | 0.847               |

**Supplementary Table 4.** Pearson's correlation coefficients computed between the estimated hidden subnetworks obtained from autoencoder algorithms applied to the discovery set from the original UK Biobank sample (n=~10,000) and several new replication data splits of 10,000 participants from the February/March UK Biobank release.

| <b>Group</b>       | <b>Social Trait</b>     | <b>Data split 1</b> | <b>Data split 2</b> | <b>Data split 3</b> | <b>Data split 4</b> |
|--------------------|-------------------------|---------------------|---------------------|---------------------|---------------------|
| less social female | Friendship satisfaction | 0.396               | 0.356               | 0.411               | 0.294               |
|                    | Living alone            | 0.208               | 0.547               | 0.608               | 0.255               |
|                    | Loneliness              | 0.395               | 0.545               | 0.240               | 0.122               |
|                    | Romantic partners       | 0.674               | 0.712               | 0.588               | 0.665               |
|                    | Social job              | 0.488               | 0.480               | 0.748               | 0.479               |
|                    | Social support          | 0.642               | 0.528               | 0.580               | 0.512               |
| less social male   | Friendship satisfaction | 0.516               | 0.568               | 0.481               | 0.395               |
|                    | Living alone            | 0.160               | 0.223               | 0.228               | -0.006              |
|                    | Loneliness              | 0.371               | 0.577               | 0.365               | 0.440               |
|                    | Romantic partners       | 0.564               | 0.675               | 0.713               | 0.573               |
|                    | Social job              | 0.542               | 0.429               | 0.551               | 0.433               |
|                    | Social support          | 0.477               | 0.520               | 0.368               | 0.480               |
| more social female | Friendship satisfaction | 0.495               | 0.451               | 0.291               | 0.245               |
|                    | Living alone            | 0.349               | -0.042              | -0.151              | 0.400               |
|                    | Loneliness              | 0.242               | 0.383               | 0.324               | 0.231               |
|                    | Romantic partners       | 0.486               | 0.497               | 0.547               | 0.262               |
|                    | Social job              | 0.470               | 0.507               | 0.281               | 0.452               |
|                    | Social support          | 0.323               | 0.372               | 0.282               | 0.446               |
| more social male   | Friendship satisfaction | 0.240               | 0.232               | 0.156               | 0.101               |
|                    | Living alone            | 0.517               | 0.351               | 0.299               | 0.238               |
|                    | Loneliness              | 0.425               | 0.411               | 0.380               | 0.017               |
|                    | Romantic partners       | 0.562               | 0.371               | 0.442               | 0.540               |
|                    | Social job              | 0.570               | 0.543               | 0.432               | 0.463               |
|                    | Social support          | 0.492               | 0.339               | 0.588               | 0.337               |

**Supplementary Table 5.** Pearson's correlation coefficients computed between predictive model estimates obtained from the discovery set of the original UK Biobank sample (n~10,000) and those<sup>2,3</sup> from several new replication data splits of 10,000 participants from the February/March UK Biobank release.

| <b>Social trait</b>     | <b>less social females</b> | <b>more social females</b> | <b>less social males</b> | <b>more social males</b> |
|-------------------------|----------------------------|----------------------------|--------------------------|--------------------------|
| Social support          | 0.295                      | 0.289                      | 0.298                    | 0.265                    |
| Friendship satisfaction | 0.306                      | 0.245                      | 0.285                    | 0.309                    |
| Romantic partners       | 0.269                      | 0.422                      | 0.363                    | 0.257                    |
| Loneliness              | 0.247                      | 0.232                      | 0.289                    | 0.310                    |
| Living alone            | 0.293                      | 0.270                      | 0.282                    | 0.227                    |
| Social job              | 0.301                      | 0.273                      | 0.305                    | 0.251                    |

**Supplementary Table 6.** Table of predictive model performances specific for each of the six social traits (with age covariate, see Sup. Table 7), computed in the original UK Biobank sample (n~10,000).



| <b>Social trait</b>     | <b>less social females</b> | <b>more social females</b> | <b>less social males</b> | <b>more social males</b> |
|-------------------------|----------------------------|----------------------------|--------------------------|--------------------------|
| Social support          | 0.3041                     | 0.2779                     | 0.2777                   | 0.2673                   |
| Friendship satisfaction | 0.2820                     | 0.2543                     | 0.3027                   | 0.2697                   |
| Romantic partners       | 0.2433                     | 0.3030                     | 0.2779                   | 0.3079                   |
| Loneliness              | 0.2204                     | 0.2193                     | 0.3030                   | 0.2707                   |
| Living alone            | 0.2406                     | 0.2596                     | 0.2727                   | 0.2236                   |
| Social job              | 0.3078                     | 0.2396                     | 0.2997                   | 0.2448                   |

**Supplementary Table 7.** Table of predictive model performances specific for each of the six social traits (without age covariate), computed in the original UK Biobank sample (n~10,000).

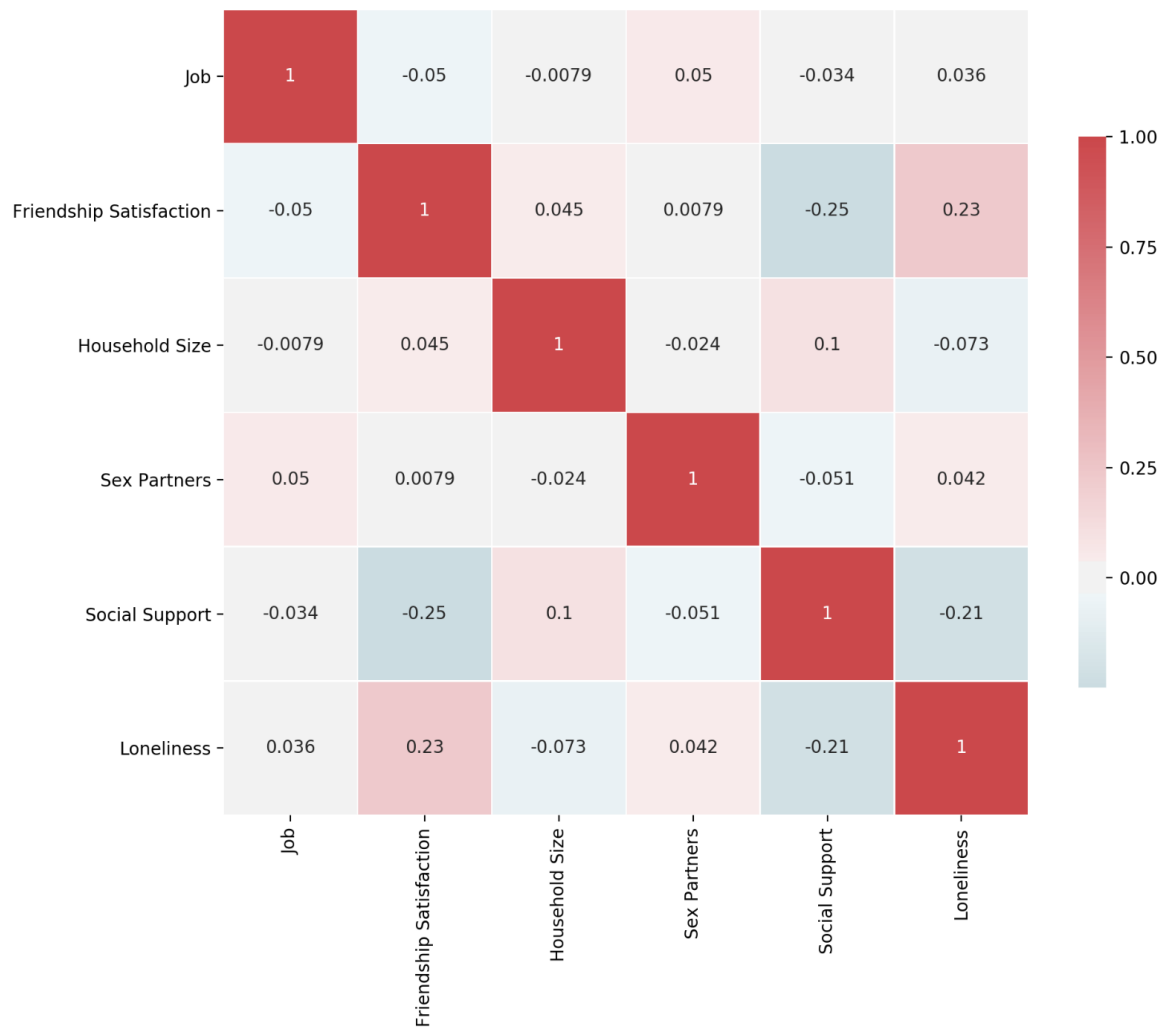

**Supplementary Fig. 1: Correlation of social markers from the UK Biobank.** Each square represents the correlation between a pair of examined social traits. Correlations are ordered by positive (red) and negative (blue) values. We computed 36 unique combinations of social traits in ~10,000 people, none of which exceed an absolute correlation strength of  $\rho = 0.25$ .

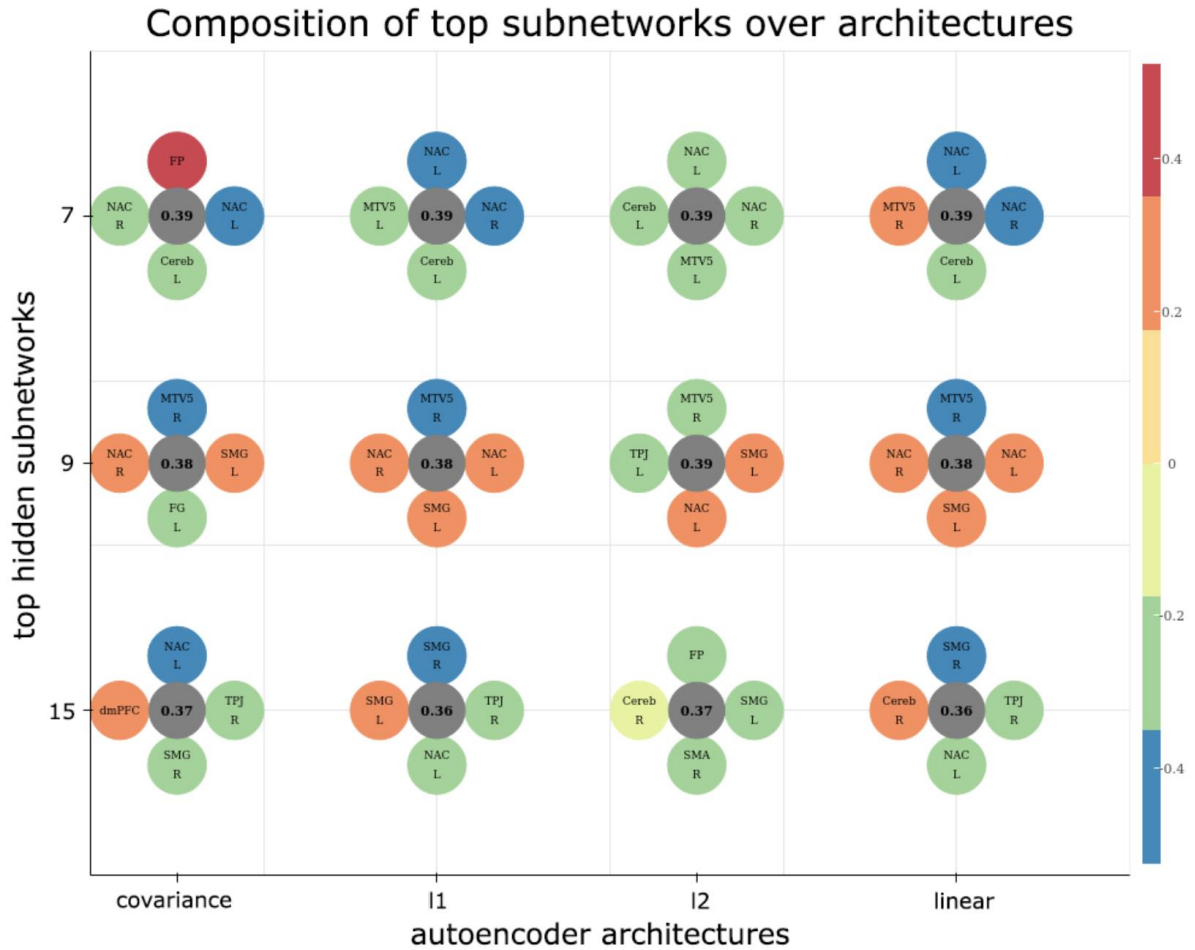

**Supplementary Fig. 2. Distinct autoencoder architectures yielded similar region relevances in the top social subnetworks.** Each of the social brain region relevances are depicted for the top hidden subnetworks. These relevances are stable, even when repeating the same analysis with the same data but using different autoencoder architectures. The four most relevant social brain regions are shown for the different autoencoder architectures (x-axis) and their three dominant subnetworks (y-axis). The values inside of the grey central circles show each subnetwork's importance (explained variance), while the four surrounding circles represent the strongest contributing brain regions for that specific hidden subnetwork. The colors of the highest contributing brain regions represent their contribution to the respective hidden subnetwork. At the level of specific regions composing the three top social subnetworks for a given model type, the linear, l1- and l2-penalized model architectures show nearly identical modeling solutions. Only the covariance model shows small differences, including higher region relevances for the pSTS and FG. These results show that the dominant three subnetworks are nearly identical for different autoencoder architectures, supporting the stability of the allocated region relevances of the prominent linear autoencoder.

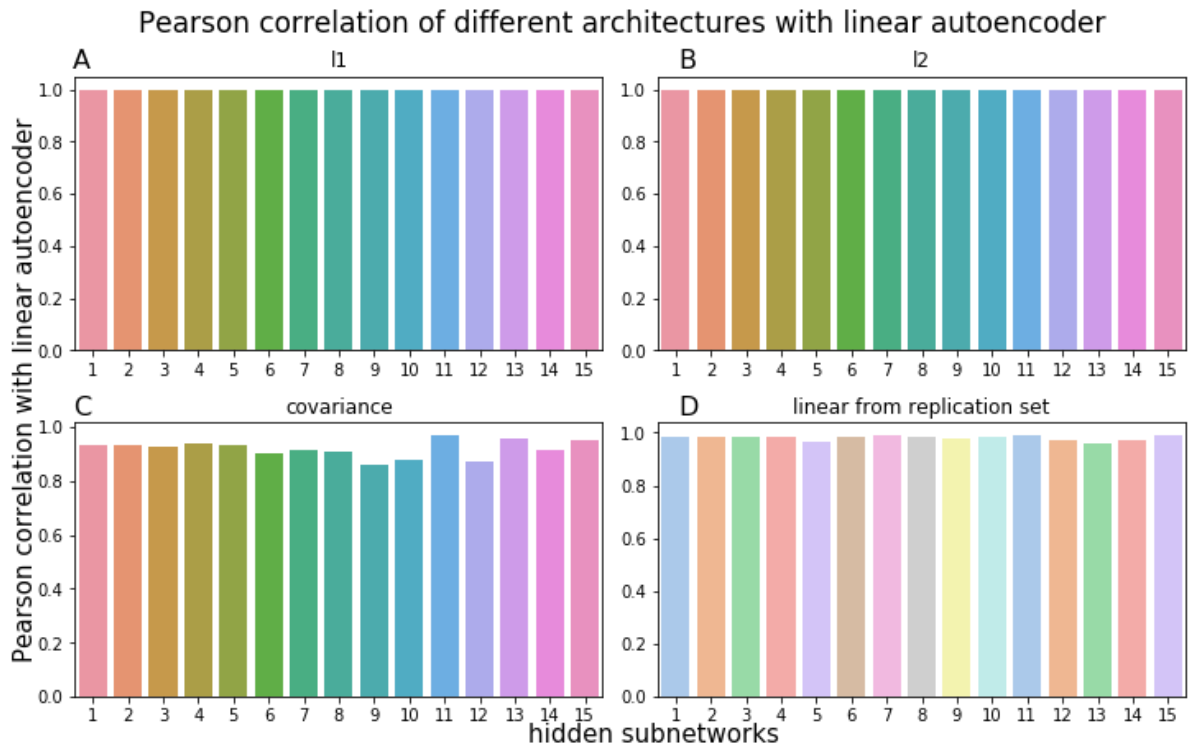

**Supplementary Fig. 3: Stability of relevance allocated to the 36 regions for each particular subnetwork.** The linear autoencoder architecture (cf. Fig. 4, column 4) is compared against three different competing model architectures (cf. Fig. 4, columns 1-3): (A) imposing additional parsimony by imposing exactly-zero region relevances, (B) imposing smaller absolute individual region relevances, and (C) imposing small correlation between subnetworks. In the plots, each bar displays the Pearson correlation between one subnetwork’s set of 36 region relevances and that of the linear autoencoder’s 36 region relevances. The results show that all subnetworks are highly correlated with the respective subnetworks from the linear autoencoder. Furthermore, the bottom right plot (D) shows the same correlation between the linear autoencoder trained and tested on independently drawn training and test sets. These high correlations show that our found subnetworks are highly robust between observed architectures (A-C) and datasets (D).

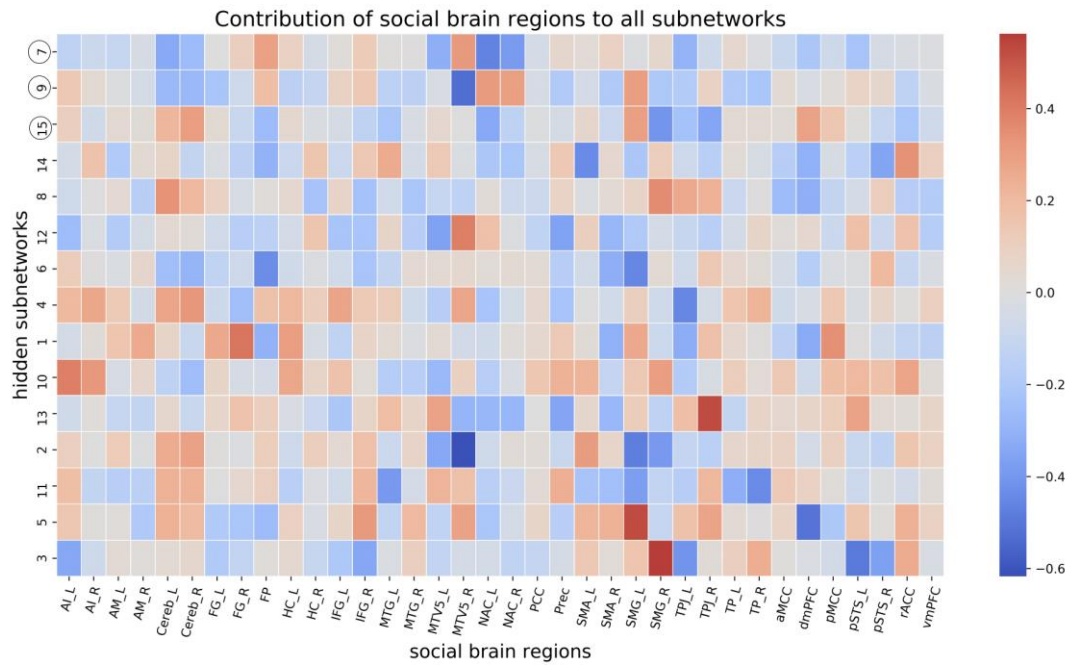

**Supplementary Fig. 4: Relevance of each social brain region to all hidden social brain subnetwork representations.** The heatmap depicts the different volume effects of each of the 36 social brain regions (x-axis) to all the learned hidden subnetworks (y-axis). The relevance of each particular brain region to the all hidden subnetworks is represented by their color for a respective combination of region and subnetwork. Blue colors depict less relevance to a specific subnetwork, while red colors depict more relevance to a given subnetwork.

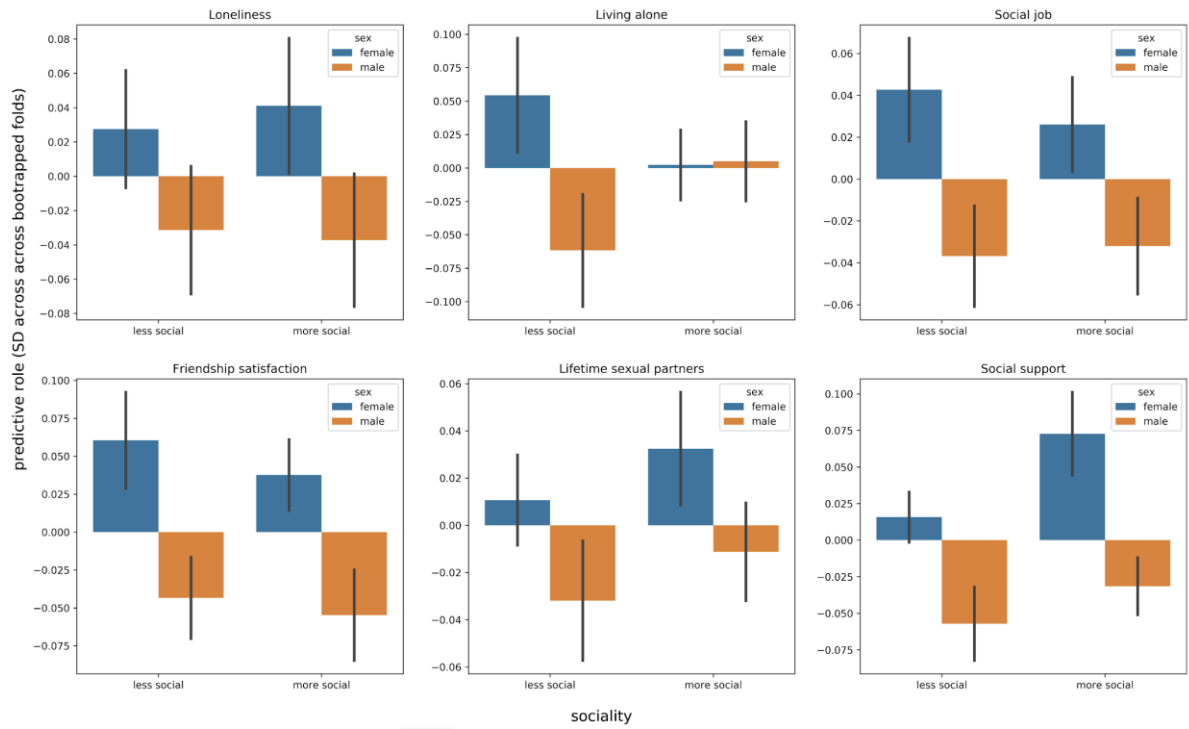

**Supplementary Fig. 5: Predictive role of sex differences in subnetwork 10.** Each plot depicts the predictive ability (y-axis) of subnetwork 10 for social and non-social individuals (x-axis), split by sex (males in blue and females in orange) for each social marker. Subnetwork 10 shows a sex difference especially for social support, friendship satisfaction and the lifetime number of sexual partners.

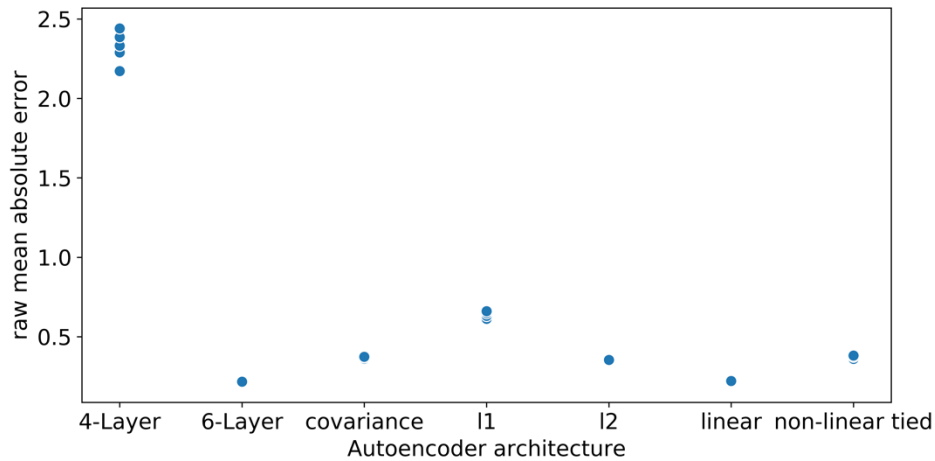

**Supplementary Fig. 6: Model performance for different autoencoder neural networks from deep learning.** After forming a given autoencoder model based on the training participants, all models' explained variance performances (i.e., mean absolute error) were evaluated on independent test participants. The explained variance of model performance across data splits are shown in the individual data points for each autoencoder architecture. The information provided here is identical to Figure 2, however displayed in a scatterplot format.

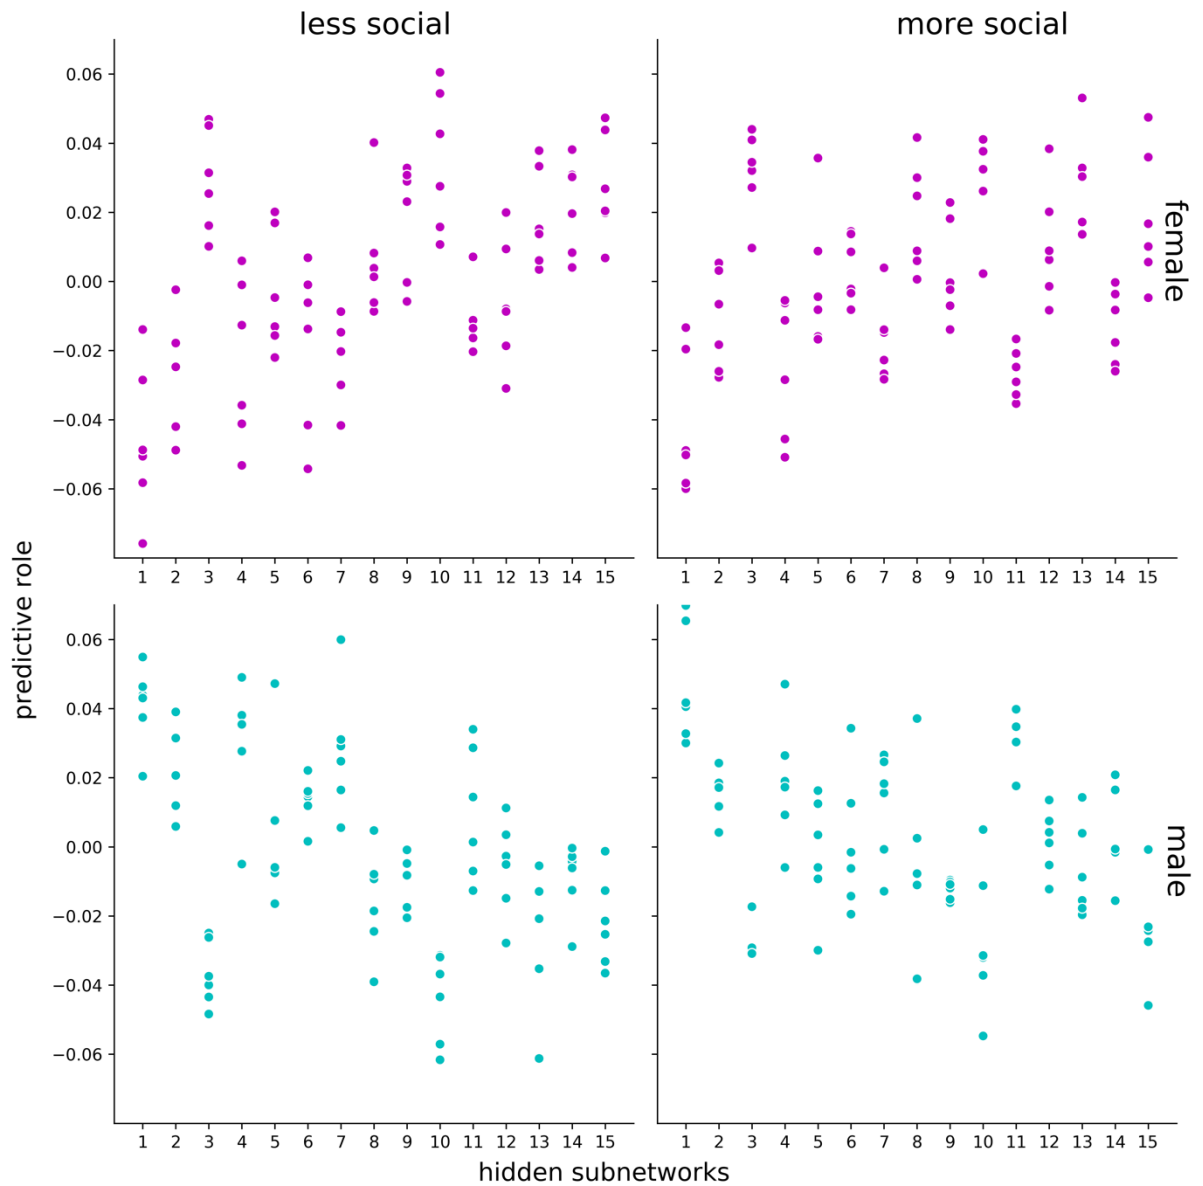

**Supplementary Fig. 7: Overall predictive role of the hidden subnetworks for tracking more versus less social exchange.** A logistic-loss classification algorithm was trained based on variation in subnetwork expressions across participants to learn predictive patterns for distinguishing the amount of regular social stimulation in men and women. The predictive contributions (*y axis*) corresponding to each subnetwork (*x axis*) are shown in the individual data points for degree of sociality for each of the four target groups. The information provided here is identical to Figure 6, however displayed in a scatterplot format.



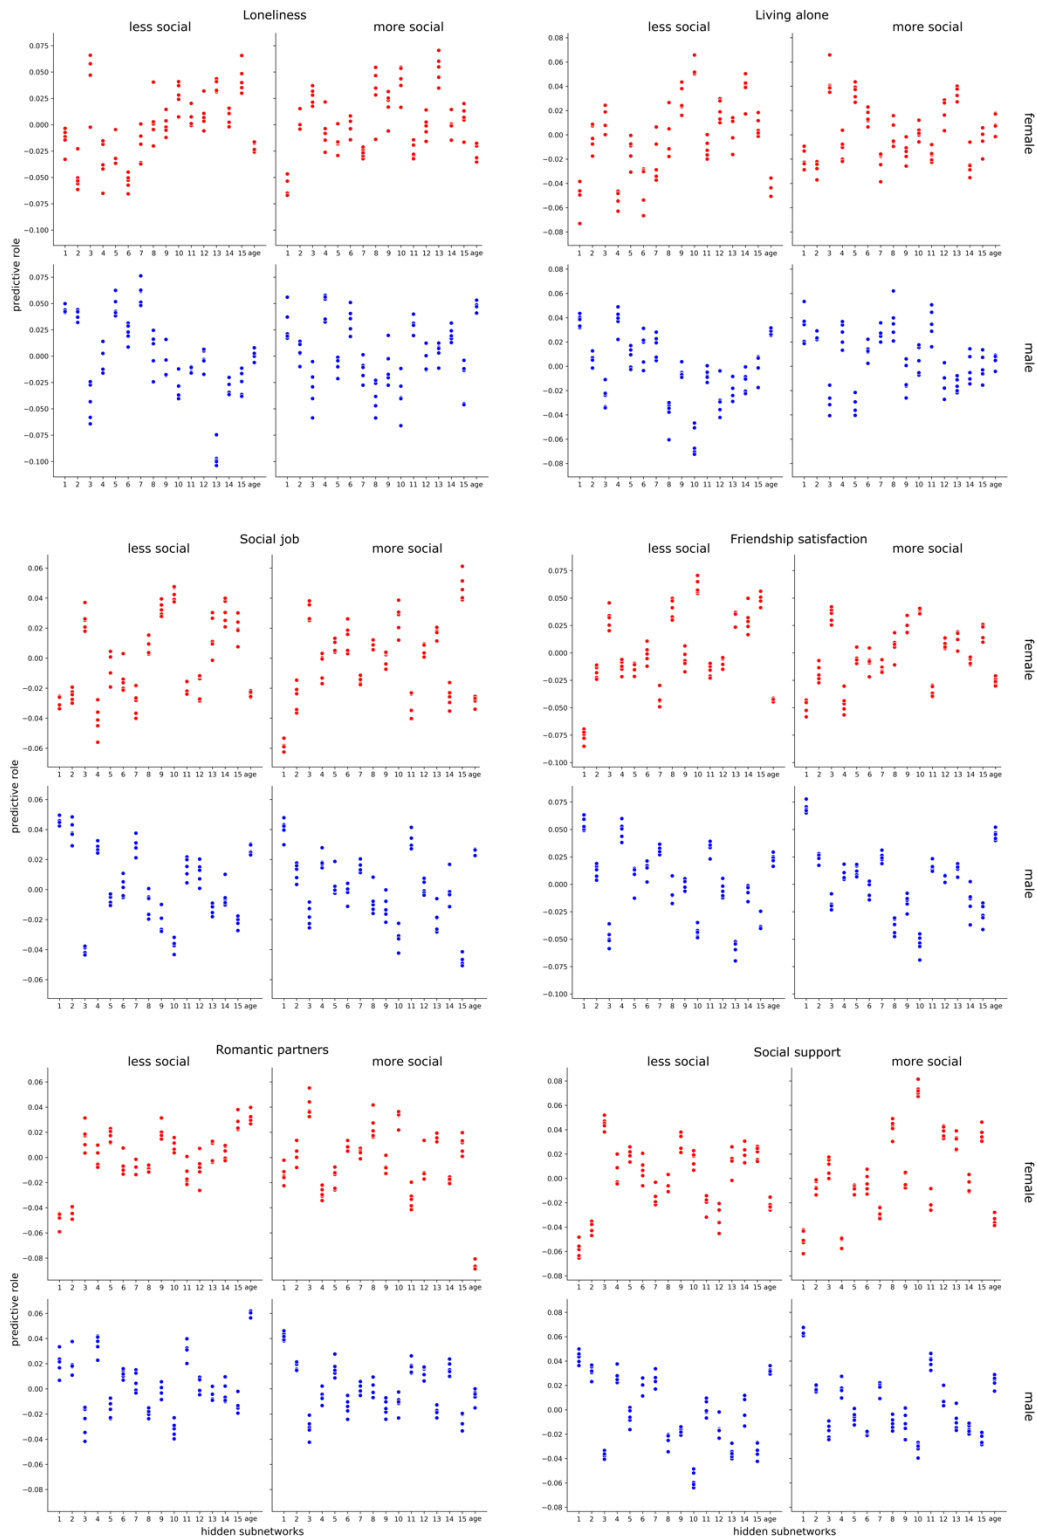

**Supplementary Fig. 8: Specific predictive profile of the hidden subnetworks for tracking single social markers.** The classification algorithm (cf. Fig. 6) was applied to learn predictive patterns separately for each social marker. The predictive contributions (y axis, units on z-scale) corresponding to each hidden subnetwork (x axis) are shown in the individual data points for each examined social trait, for each of the four target groups. The information provided here is identical to Figure 7, however displayed in a scatterplot format.

1. Alcalá-López D, *et al.* Computing the Social Brain Connectome Across Systems and States. *Cereb Cortex* **28**, 2207-2232 (2018).
2. Bzdok D. Classical Statistics and Statistical Learning in Imaging Neuroscience. *Front Neurosci* **11**, 543 (2017).
3. Hastie T, Tibshirani R, Friedman J. *The elements of statistical learning: data mining, inference, and prediction*. Springer Science & Business Media (2009).
